# Supplementary material for: Physicochemical characterization of free troposphere and marine boundary layer ice-nucleating particles collected by aircraft in the eastern North Atlantic
Source: Copernicus journal article supplement (doi:10.5194/egusphere-2023-559), 2023-04-12
Supplement: Supplementary file 1 [file egusphere-2023-559-supplement.pdf]

# Supplement of

## Physicochemical characterization of free troposphere and marine boundary layer ice-nucleating particles collected by aircraft in the eastern North Atlantic

5 Daniel A. Knopf<sup>1</sup>, Peiwen Wang<sup>1</sup>, Benny Wong<sup>1</sup>, Jay M. Tomlin<sup>2</sup>, Daniel P. Veghte<sup>3†</sup>, Nurun N. Lata<sup>3</sup>,  
Swarup China<sup>3</sup>, Alexander Laskin<sup>2</sup>, Ryan C. Moffet<sup>4</sup>, Josephine Y. Aller<sup>1</sup>, Matthew A. Marcus<sup>5</sup>, Jian  
Wang<sup>6</sup>

<sup>1</sup>School of Marine and Atmospheric Sciences, Stony Brook University, Stony Brook, NY 11794, USA

<sup>2</sup>Department of Chemistry, Purdue University, West Lafayette, IN 47907, USA

10 <sup>3</sup>Environmental Molecular Sciences Laboratory/Pacific Northwest National Laboratory, Richland, WA 99354, USA

<sup>4</sup>Sonoma Technology, Inc., Petaluma, CA 94954, USA

<sup>5</sup>Advanced Light Source, Lawrence Berkeley National Laboratory, Berkeley, CA 94720, USA

<sup>6</sup>Center for Aerosol Science and Engineering, Department of Energy, Environmental and Chemical Engineering, Washington  
University in St. Louis, St. Louis, MO 63130, USA

15

†Current address: Center for Electron Microscopy and Analysis, The Ohio State University, Columbus, OH 43212, USA

*Correspondence to:* Daniel A. Knopf (daniel.knopf@stonybrook.edu)

This Supplement comprises of nine figures (S1-S9).

20

25

30

35

7/7/2017 IOP1-MBL1

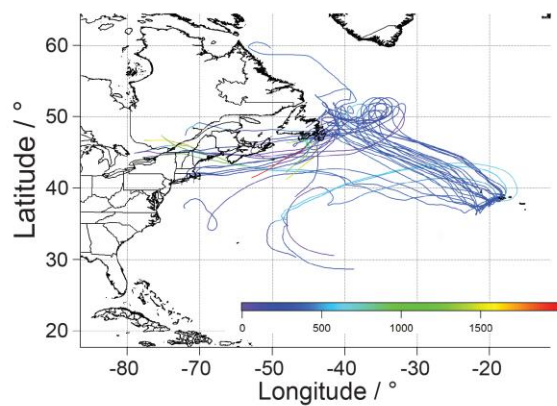

7/15/2017 IOP1-FT1

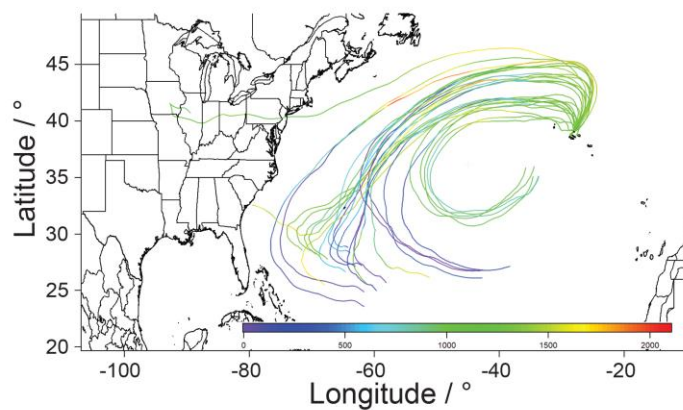

1/25/2018 IOP2-MBL1

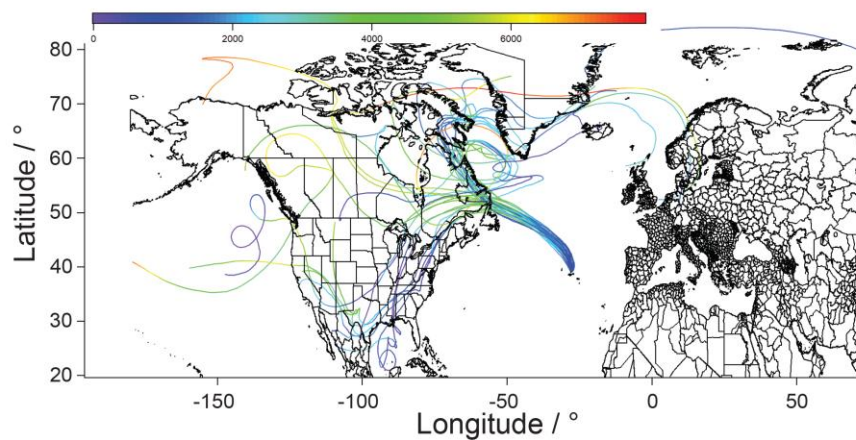

40

Figure S1: Representative 10-day backward trajectories for examined airborne-collected marine boundary layer (MBL) and free troposphere (FT) particle samples starting at given sampling altitude. The trajectories are colored by their altitude (m).

1/25/2018 IOP2-FT1

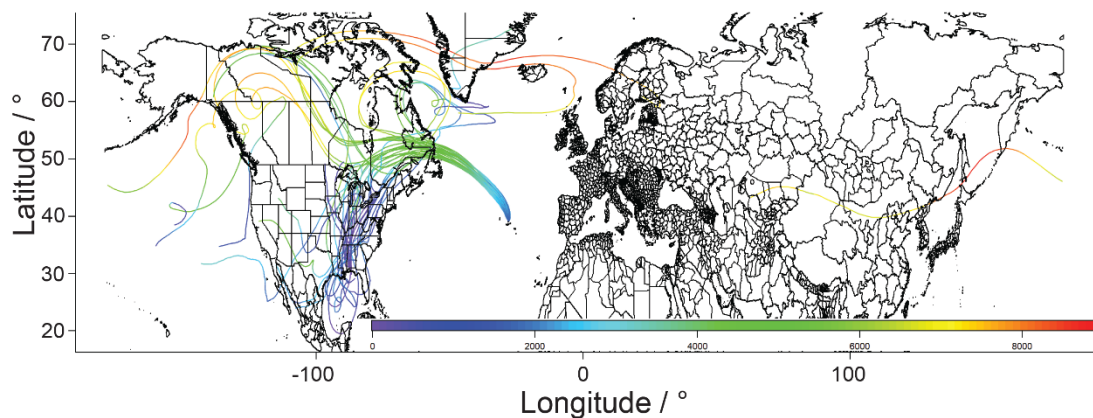

1/30/2018 IOP2-FT2

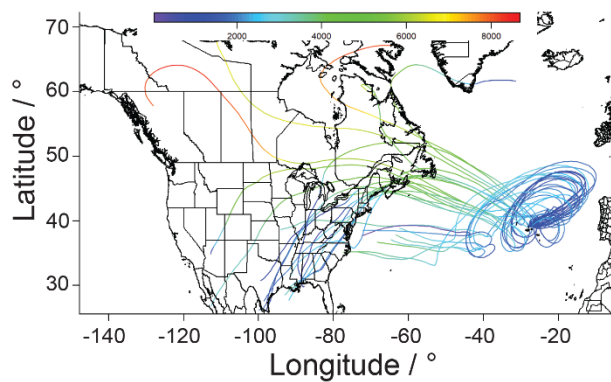

2/1/2018 IOP2-MBL2

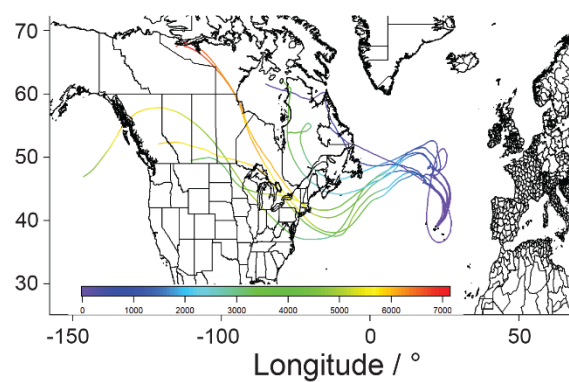

2/19/2018 IOP2-FT3

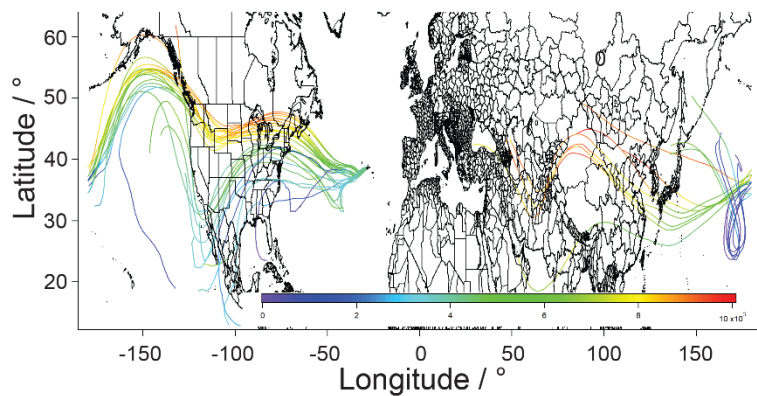

45 **Figure S2: Representative 10-day backward trajectories for examined airborne-collected marine boundary layer (MBL) and free troposphere (FT) particles starting at given sampling altitude. The trajectories are colored by their altitude (m).**

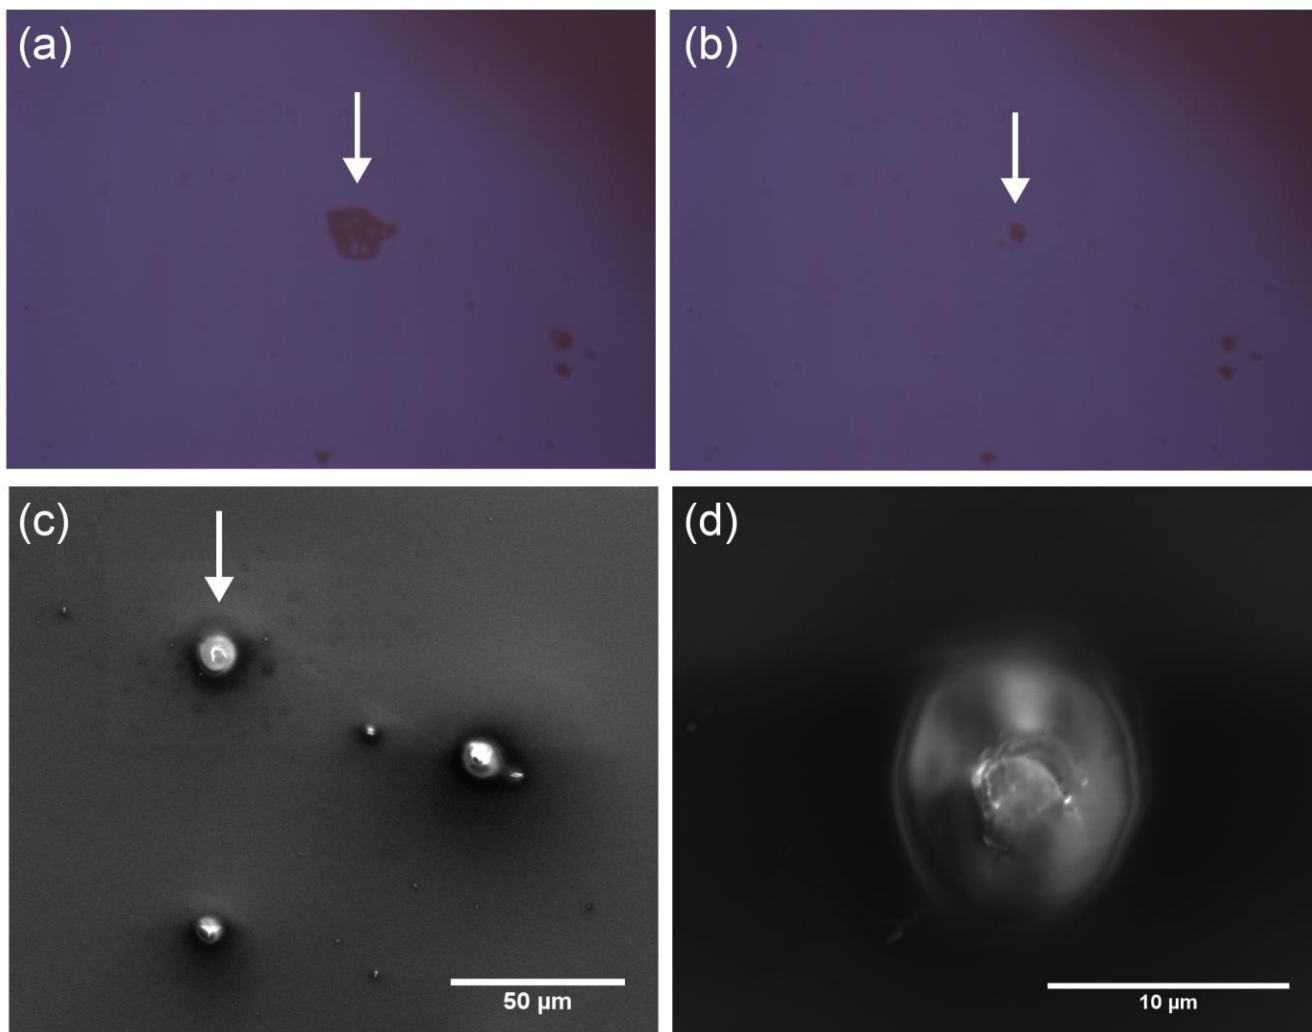

50 **Figure S3: Procedure to identify the ice nucleating particle (INP) from optical microscope images (panels a and b) in scanning electron microscopy (panels c and d). Panel (b) shows the residual particles after ice crystal sublimation. White arrow indicates the INP.**

07/07/17 IOP1-MBL1

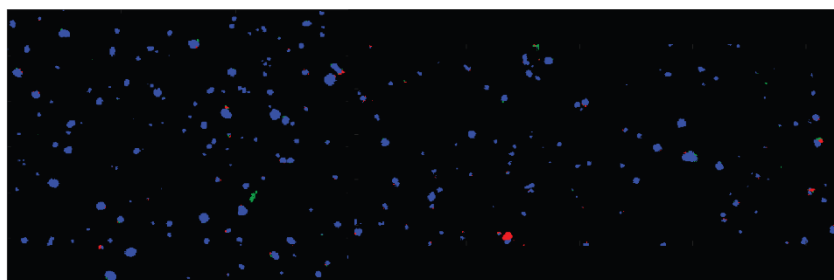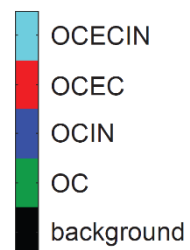

01/25/18 IOP2-MBL1

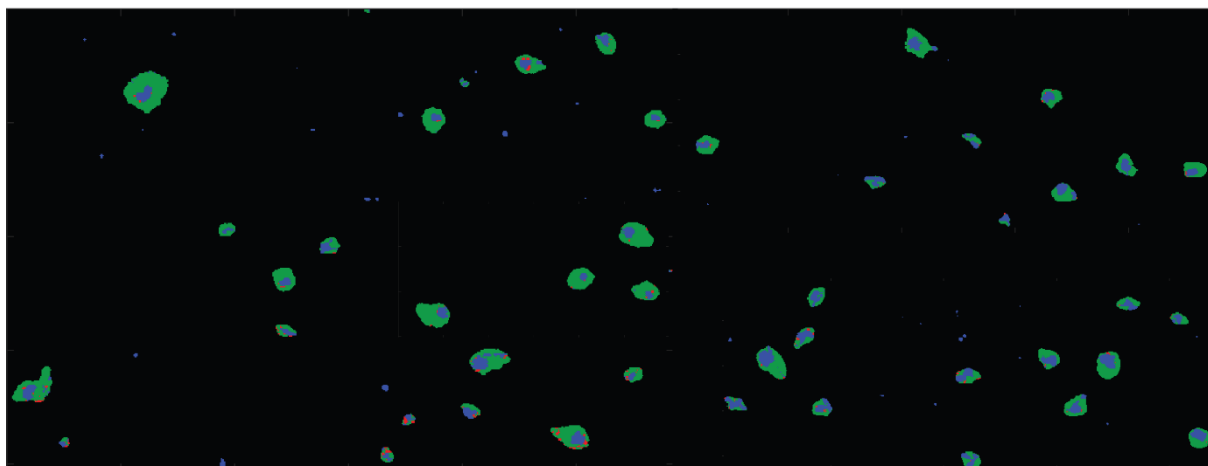

02/01/18 IOP2-MBL2

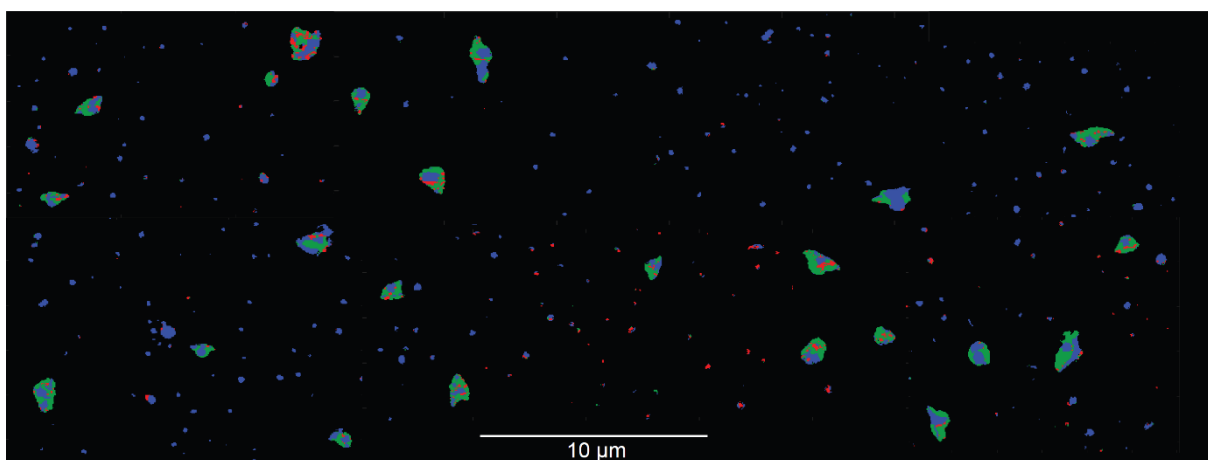

55 **Figure S4: Representative particle mixing state analysis of particle samples collected in the marine boundary layer (MBL) where IN - inorganic, EC - elemental carbon, and OC - organic carbon. The scale bar holds for all panels.**

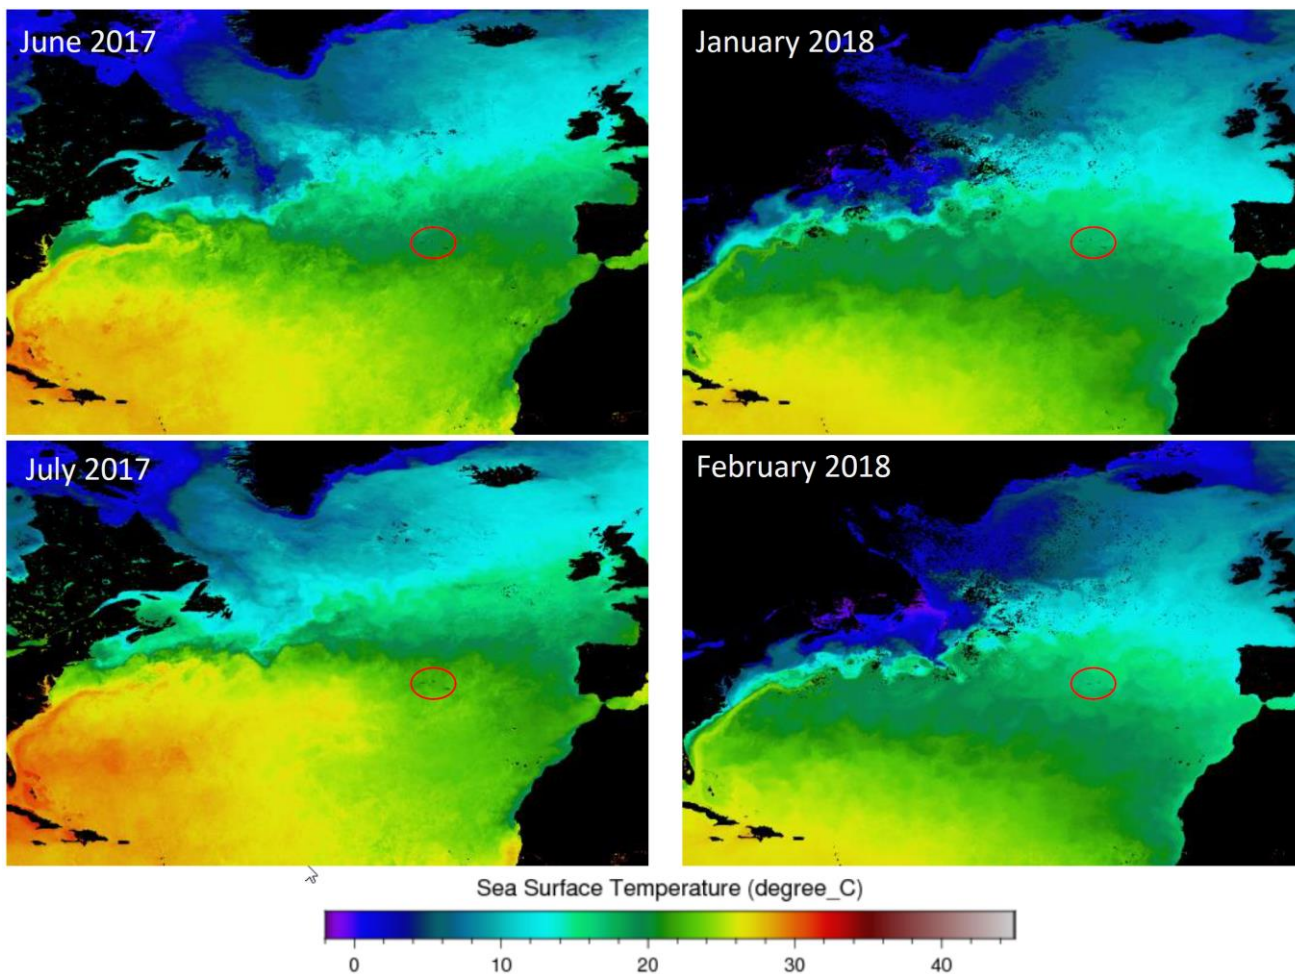

60 **Figure S5: Monthly mean sea surface temperature derived by Aqua MODIS (Moderate Resolution Imaging Spectroradiometer) during daytime at 11  $\mu\text{m}$  and 4 km resolution (NASA Goddard Space Flight Center, 2019). Red circles indicate location of Azores Islands.**

65



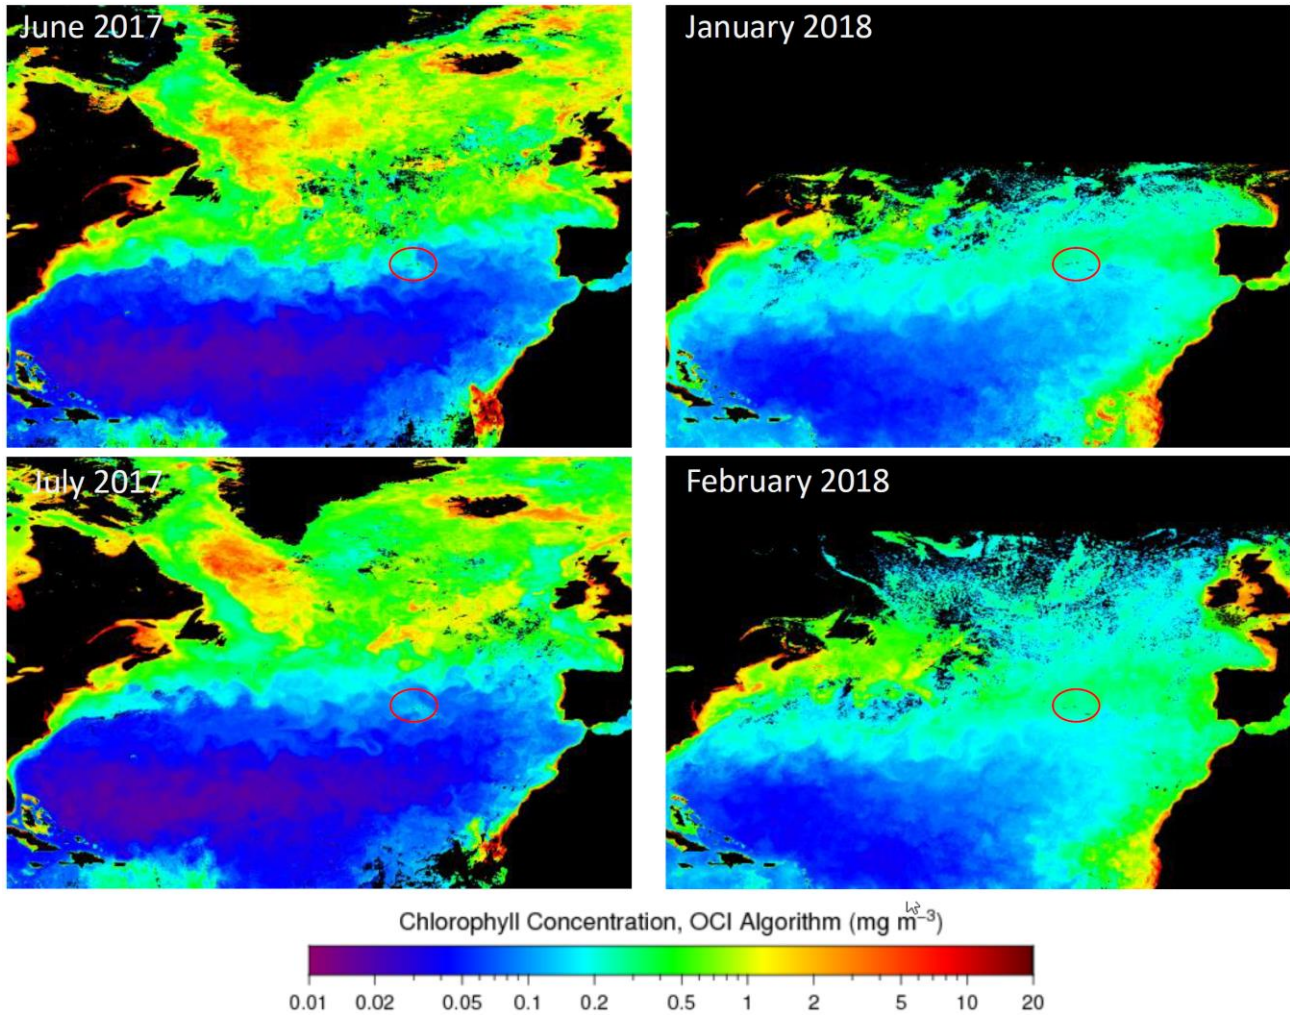

**Figure S6: Monthly mean chlorophyll a concentration derived by Aqua MODIS (Moderate Resolution Imaging Spectroradiometer) at 4 km resolution (NASA Goddard Space Flight Center, 2022). Red circles indicate location of Azores Islands.**

07/15/17 IOP1-FT1

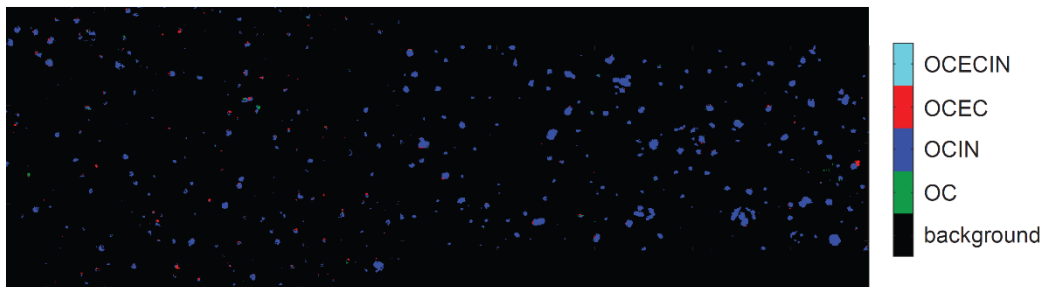

01/25/18 IOP2-FT1

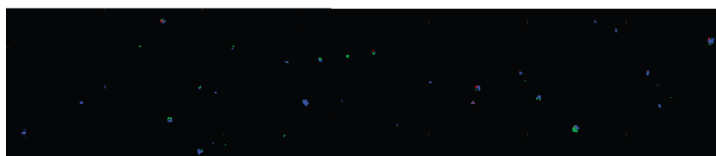

01/30/18 IOP2-FT2

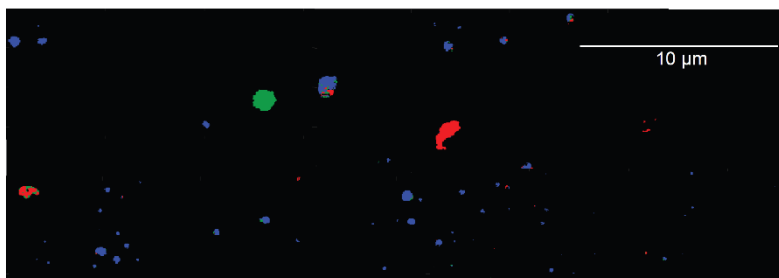

02/19/18 IOP2-FT3

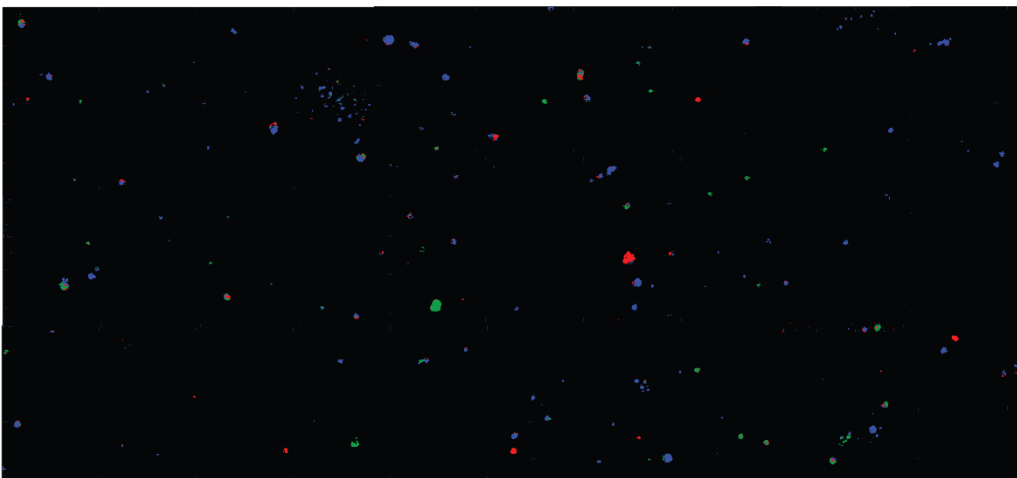

85

**Figure S7: Representative particle mixing state analysis of particle samples collected in the free troposphere (FT) where IN - inorganic, EC - elemental carbon, and OC - organic carbon. The scale bar holds for all panels.**



**IOP1-FT1 243 K**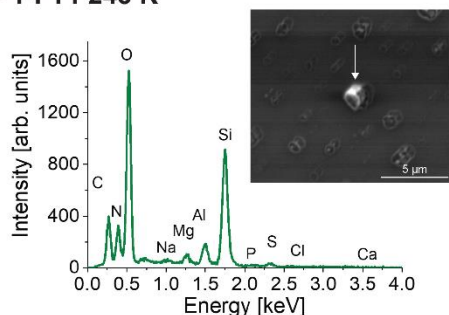**IOP1-FT1 233 K**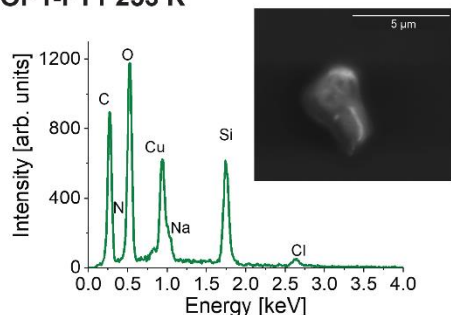**IOP1-FT1 233 K**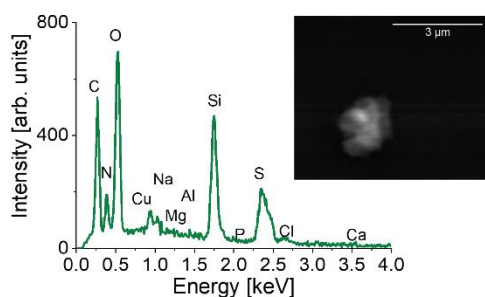**IOP1-FT1 223 K**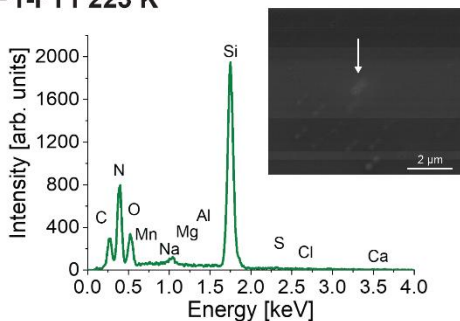**IOP1-FT1 223 K**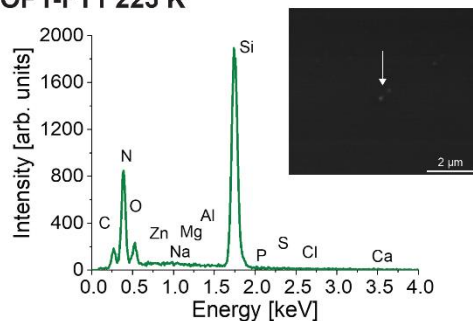**IOP1-FT1 223 K**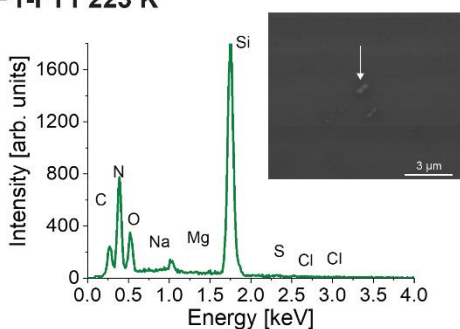**IOP1-FT1 223 K**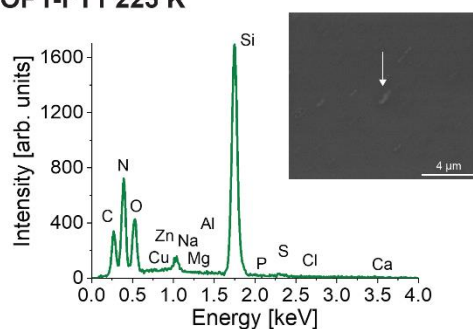

90 **Figure S8: EDX spectra of identified INPs from particles samples collected during IOP1 under free troposphere (FT) conditions with corresponding SEM obtained particle image. Si and N signals stem from the substrate ( $\text{Si}_3\text{N}_4$  coated silicon wafer chips) and the chamber/holder (Al).**

IOP2-FT1 223 K

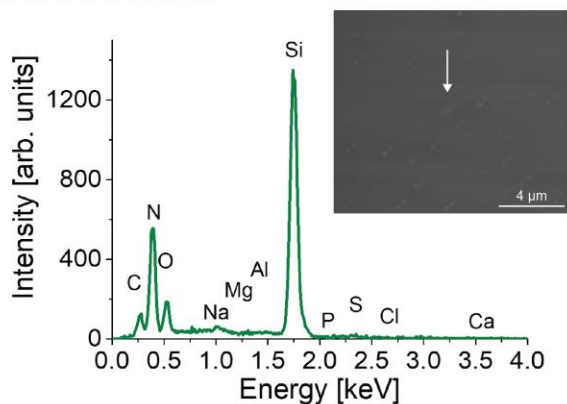

IOP2-FT1 223 K

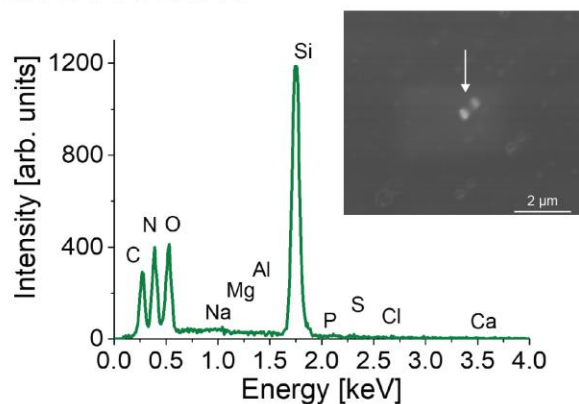

IOP2-FT1 223 K

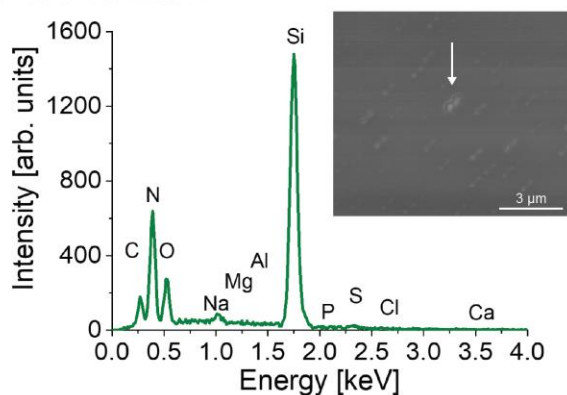

IOP2-FT3 223 K

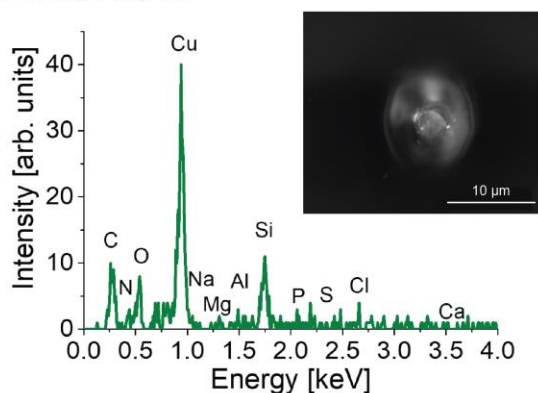

IOP2-FT3 223 K

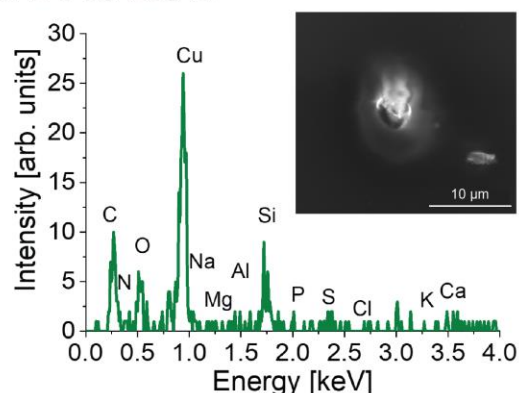

95 **Figure S9: EDX spectra of identified INPs from particles samples collected during IOP2 under free troposphere (FT) conditions with corresponding SEM obtained particle image. Si and N signals stem from the substrate ( $\text{Si}_3\text{N}_4$  coated silicon wafer chips) and the chamber/holder (Al).**

## References

100 NASA Goddard Space Flight Center, Ocean Ecology Laboratory, Ocean Biology Processing Group. Moderate-resolution Imaging Spectroradiometer (MODIS) Aqua Global Level 3 Mapped SST. Ver. 2019.0. PO.DAAC, CA, USA. Dataset accessed [2023-03-21] at <https://doi.org/10.5067/MODSA-MO4D9>.

105 NASA Goddard Space Flight Center, Ocean Ecology Laboratory, Ocean Biology Processing Group. Moderate-resolution Imaging Spectroradiometer (MODIS) Aqua Chlorophyll Data; 2022 Reprocessing. NASA OB.DAAC, Greenbelt, MD, USA. doi: 10.5067/AQUA/MODIS/L3B/CHL/2022. Accessed on 03/21/2023
